# Supplementary material
Source: HighWire-hosted journal article supplement (https://erj.ersjournals.com/content/56/1/2001832)
Supplement: inline-supplementary-material-1 [file inline-supplementary-material-1.pdf]

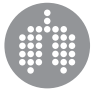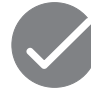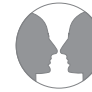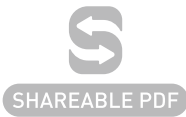

# Abnormal carbon monoxide diffusion capacity in COVID-19 patients at time of hospital discharge

Samir Nusair <sup>1,2</sup>

**Affiliations:** <sup>1</sup>Rokach Center for the Prevention of Lung Diseases, Clalit Health Services, Jerusalem Region, Affiliated to The Faculty of Medicine, Hebrew University and Hadassah, Jerusalem, Israel. <sup>2</sup>Institute of Pulmonary Medicine, Hadassah-Hebrew University Medical Center, Jerusalem, Israel.

**Correspondence:** Samir Nusair, Institute of Pulmonary Medicine, Hadassah-Hebrew University Medical Center, PO Box 12000, Jerusalem 91120, Israel. E-mail: samjack@actcom.co.il

@ERSpublications

**On recovery from COVID-19 it is important to draw attention to the CO diffusion test and the actual meaning of the findings when considering the values of  $D_{LCO}$  and  $D_{LCO}/V_A$  put together**  
<https://bit.ly/36k2O2Q>

**Cite this article as:** Nusair S. Abnormal carbon monoxide diffusion capacity in COVID-19 patients at time of hospital discharge. *Eur Respir J* 2020; 56: 2001832 [<https://doi.org/10.1183/13993003.01832-2020>].

This single-page version can be shared freely online.

*To the Editor:*

I have read with great interest the article by Mo *et al.* [1] entitled “Abnormal pulmonary function in COVID-19 patients at time of hospital discharge” recently published in the *European Respiratory Journal*. In this study, the authors describe pulmonary function tests in patients who suffered from coronavirus disease 2019 (COVID-19), which were performed on discharge from hospital. Patients were classified into three groups of severity. In the patients who suffered more severely, measured carbon monoxide diffusion capacity ( $D_{LCO}$ ) was lower. However, when looking at  $D_{LCO}/V_A$ , which represents the transfer factor of carbon monoxide, the picture is different. Patients who had severe pneumonia had an average  $D_{LCO}/V_A$  of 82% of predicted while patients in groups classified as having mild disease or pneumonia had average values above 90%. Notably, all these averages have relatively high standard deviation values (e.g. 13.9% in severe pneumonia), meaning that some patients in the post-severe pneumonia group had a  $D_{LCO}/V_A >90\%$  of predicted.
